# Supplementary material
Source: publisher site journal article supplement (https://www.dovepress.com/get_supplementary_file.php?f=454558.docx)
Supplement: Supplementary file 1 [file get_supplementary_file.php]

**Table 1S** Baseline characteristics in the HRF (+) and HRF (-) groups

| Variables | Overall  (n = 334) | HRF (+)  (n = 96) | HRF (-)  (n = 238) | χ2/t/Z Value | *P* |
| --- | --- | --- | --- | --- | --- |
| Age (years) | 76.00 (71.00,82.00) | 78.50  (72.00, 83.00) | 75.00  (70.00, 81.00) | -2.471 | 0.013* |
| Height (cm) | 165.00  (158.00, 170.00) | 165.00  (156.00, 170.00) | 165.00  (160.00, 170.00) | -0.152 | 0.879 |
| Weight (kg) | 59.00  (51.00, 66.00) | 57.50  (50.00, 65.00) | 59.50  (52.38, 66.25) | -1.317 | 0.188 |
| BMI (kg/m2) | 22.08 ± 3.95 | 21.6 ± 3.70 | 22.26 ± 4.03 | 1.368 | 0.172 |
| Female (n, %) | 67 (20.1) | 23 (24.0) | 44 (18.5) | 1.277 | 0.258 |
| Smoking (n, %) | 199 (59.6) | 52 (54.2) | 147 (61.8) | 1.640 | 0.200 |
| WBC (×109/L) | 6.51 (5.15, 8.44) | 6.20 (5.24, 7.61) | 6.73 (5.12, 9.27) | -1.344 | 0.179 |
| NEU (×109/L) | 4.63 (3.60, 6.51) | 4.65 (3.85, 6.38) | 4.63 (3.50, 6.81) | -0.185 | 0.853 |
| LYM (×109/L) | 1.02 (0.74,1.36) | 0.84 (0.65,1.11) | 1.11 (0.78,1.42) | -4.264 | ＜0.001* |
| E (×109/L) | 0.08 (0.02, 0.15) | 0.07 (0.01, 0.13) | 0.08 (0.03, 0.16) | -1.196 | 0.232 |
| PLT (×109/L) | 171.50  (137.88, 216.25) | 172.00  (127.25, 203.10) | 171.00  (141.00, 217.25) | -1.329 | 0.184 |
| NLR (%) | 4.55 (3.18, 7.84) | 5.26 (3.98, 7.79) | 4.19 (2.90, 7.94) | -3.085 | 0.002* |
| PLR (%) | 180.35  (122.86, 243.40) | 199.85  (144.83, 258.57) | 167.28  (118.03, 232.73) | -2.609 | 0.009* |
| HCT (%) | 41.60  (38.75, 44.73) | 44.60  (41.95, 48.10) | 40.75  (37.85, 43.23) | -6.591 | ＜0.001* |
| ALB (g/L) | 39.31 ± 4.14 | 37.54 ± 4.34 | 40.02 ± 3.83 | 5.155 | ＜0.001* |
| BUN (mmol/L) | 6.60 (5.60, 8.20) | 6.27 (5.16, 8.38) | 6.68 (5.60, 8.20) | -1.200 | 0.230 |
| PNI (%) | 44.88  (41.00, 48.25) | 42.40  (38.65, 45.91) | 45.43  (42.30, 49.08) | -5.508 | ＜0.001* |
| ADL (score) | 80.00  (70.00, 90.00) | 70.00  (65.00, 80.00) | 85.00  (75.00, 90.00) | -7.378 | ＜0.001* |

Note: Data are given as n (%), mean±standard deviation, and median ((interquartile range, IQR).

Abbreviations: BMI, body mass index; ADL, activity of daily living; NLR, neutrophil to lymphocyte ratio; PLR, platelet to lymphocyte ratio; PNI, prognostic nutritional indicators.

**P*＜0.05. *P* represented the difference between the two groups for baseline characteristics.

**Table 2S** Independent predictors associated with hypercapnic respiratory failure by multivariate analysis

| Variables | β coefficient | *SE* | OR（95% *CI）* | *P* |
| --- | --- | --- | --- | --- |
| Sex | 1.299 | 0.635 | 0.273 (0.079-0.948) | 0.041* |
| Smoking | 0.241 | 0.519 | 1.280 (0.563-3.540) | 0.635 |
| WBC | -0.071 | 0.072 | 0.931 (0.809-1.072) | 0.321 |
| PLT | -0.004 | 0.004 | 0.996 (0.988-1.003) | 0.261 |
| PNI | -0.168 | 0.054 | 0.846 (0.761-0.940) | 0.002* |
| HCT | 0.104 | 0.041 | 1.110 (1.024-1.203) | 0.011* |
| ADL | -0.072 | 0.018 | 0.931 (0.898-0.965) | ＜0.001* |

Abbreviations: PNI, prognostic nutritional indicators; HCT, hematocrit; ADL, activity of daily living; OR = Odds Ratio, *CI* = Confidence Interval.

**P*＜0.05.
